# Supplementary material for: Characterisation and Distribution of Karaka Ōkahu Purepure Virus—A Novel Emaravirus Likely to Be Endemic to New Zealand
Source: MDPI journal article supplement (doi:10.3390/v13081611), 2021-08-14
Supplement: s1 [file s1]

## Supplementary Data

**Supplementary Table S1.** Percent identity between the amino acid sequences of P1 (the RdRp or L polymerase), P2 (the glycoprotein) and P3 (the nucleocapsid) of Karaka Ōkahu purepure virus (KÖPV) and known emaravirus orthologous sequences. Names and GenBank accession numbers for each viral sequence used in this study are given. The group to which each emaravirus has been designated in this study are also given.

| Viral name                                           | Emaravirus group | P1 Protein Accession Number | % identity P1 (RdRp) | P2 Protein Accession Number | % identity P2 (glycoprotein) | P3 Protein Accession Number | % identity P3 (Nucleoprotein) |
|------------------------------------------------------|------------------|-----------------------------|----------------------|-----------------------------|------------------------------|-----------------------------|-------------------------------|
| Actinidia emaravirus 2                               | la               | QEE82886                    | 29.5                 | QEE82887                    | 17.9                         | QEE82888                    | 20.4                          |
| Aspen mosaic-associated virus                        | la               | CAA0079389                  | 29.3                 | CAA0079597                  | 18.6                         | CAA0079646                  | 18.9                          |
| Blackberry leaf mottle associated virus              | la               | AQX45473                    | 28.7                 | AQX45474                    | 19.3                         | QBM15204                    | 23.9                          |
| Fig mosaic emaravirus                                | la               | QBH72675                    | 29.7                 | QTZ21228                    | 19.6                         | QRN67942.1                  | 23.9                          |
| Maple mottle-associated virus                        | la               | QOI17315                    | 29.7                 | QOI17316                    | 18.3                         | QOI17317.1                  | 16                            |
| Pigeonpea sterility mosaic emaravirus 1              | la               | ANQ90714                    | 29.4                 | ANQ90715                    | 17.8                         | QBA83604.1                  | 16.7                          |
| Pigeonpea sterility mosaic emaravirus 2              | la               | QBA83607                    | 29.7                 | QBA83608                    | 17.9                         | CCV01188.2                  | 19.7                          |
| Pistacia emaravirus                                  | la               | QAR18002                    | 28.8                 | QAR18003                    | 19.0                         | QAR18004.1                  | 16.9                          |
| Rose rosette emaravirus                              | la               | QHZ99235                    | 29.2                 | QID76079                    | 19.4                         | QIB97957.1                  | 16                            |
| Vitis emaravirus T1                                  | la               | BCS90320                    | 29.9                 | BCS90321                    | 17.4                         | BCS90322.1                  | 17.1                          |
| Actinidia chlorotic ringspot-associated virus        | lb               | YP 009507925                | 29.1                 | ALX00128                    | 19.4                         | QBL56976                    | 14.5                          |
| European mountain ash ringspot-associated emaravirus | lb               | VFU05375                    | 30.2                 | CAD7070703                  | 21.5                         | CDL74499.1                  | 19.3                          |
| Lilac chlorotic ringspot-associated virus            | lb               | QIN85945                    | 29.8                 | QIN85946                    | 16.7                         | QIN85947                    | 15.9                          |
| Redbud yellow ringspot-associated emaravirus         | lb               | YP 009508083                | 29.0                 | AEO95761                    | 17.9                         | YP_009508085                | 16.2                          |
| Common oak ringspot-associated virus                 | lc               | CAD0281685                  | 28.8                 | CAD0281686                  | 21.5                         | CAD0281686                  | 26                            |

|                                              |     |              |      |          |      |            |      |
|----------------------------------------------|-----|--------------|------|----------|------|------------|------|
| High Plains wheat mosaic emaravirus          | Ic  | YP 009237277 | 26.9 | QGT41788 | 12.4 | QGT41068.1 | 18.1 |
| Jujube yellow mottle-associated virus        | Ic  | QDM38999     | 27.3 | QRG35046 | 17.4 | QDM39001.1 | 18.5 |
| Palo verde broom virus                       | Ic  | AWH90165     | 28.0 | AWH90172 | 18.9 | AWH90177   | 18.2 |
| Raspberry leaf blotch emaravirus             | Ic  | YP 009237274 | 27.4 | CBZ42025 | 19.1 | QCY49488   | 17.8 |
| Ti ringspot-associated emaravirus            | Ic  | QAB47307     | 28.1 | QAB47308 | 17.8 | QAB47309.1 | 24.3 |
| Chrysanthemum mosaic-associated virus        | II  | BCK60941     | 46.0 | BCK60942 | 31.9 | BCK60944   | 37.6 |
| Pear chlorotic leaf spot-associated          | II  | BCG62015     | 44.4 | QKY7700  | 30.3 | QKY77005   | 26.2 |
| Camellia japonica associated emaravirus<br>1 | III | QGX73503     | 25.3 | QGX73504 | 22.5 | QGX73505.1 | 23.6 |
| Camellia japonica associated emaravirus<br>2 | III | QGX73507     | 26.2 | QGX73508 | 21.0 | QGX73509.1 | 20.4 |
| Perilla mosaic virus                         | III | BBM96177     | 24.9 | BBM96178 | 18.1 | BBM96180   | 20   |

**Supplementary Table S2.** Primers used in this research.

| Primer Name                   | Nucleotide sequence 5' → 3'                                               | Expected product size (bp) |                              |                      |
|-------------------------------|---------------------------------------------------------------------------|----------------------------|------------------------------|----------------------|
| 3' RACE Gene Specific Primers |                                                                           |                            |                              |                      |
| 3'RACE RNA 1A                 | TAC CAT GTA TGA GAT TCT GAA CC                                            | ~315                       |                              |                      |
| 3'RACE RNA 1B                 | CTC ATC TTC AAA GAT ATC AAT GGG                                           | ~341                       |                              |                      |
| 3'RACE RNA 2A                 | CAC CCA TTA TGC TGT TAG ATG                                               | ~300                       |                              |                      |
| 3'RACE RNA 2B                 | AGT TGA CTC AGA GGT ATT CC                                                | ~370                       |                              |                      |
| 3'RACE RNA 3A-2               | CAT ACT GGT GAG TTC CTC C                                                 | ~380                       |                              |                      |
| 3'RACE RNA 3B-2               | CAT CAA TTC ACG AGT TTG GG                                                | ~300                       |                              |                      |
| 3'RACE RNA 4A                 | CCA TAT AAG TCA CTA CAT CTC AC                                            | ~290                       |                              |                      |
| 3'RACE RNA 4B                 | TCA TTG TAT TTT ATT ATG CTT GGT TG                                        | ~430                       |                              |                      |
| 3'RACE RNA 5A                 | TCC TTC TTG AGC TTA GTC AT                                                | ~300                       |                              |                      |
| 3'RACE RNA 5B                 | GAA GAA GAG ACA ATA GAG TAG AGA                                           | ~240                       |                              |                      |
| PolyA Tail Primers            |                                                                           |                            |                              |                      |
| PV1/SP6                       | GAT TTA GGT GAC ACT ATA GTTTTTTTTTTTTTTTTTTV                              |                            |                              |                      |
| SP6                           | CAT ACG ATT TAG GTG ACA CTA TAG                                           |                            |                              |                      |
| Target Segment                | Nucleotide sequence 5' → 3'                                               | Expected product size (bp) | Uniplex (U) or Multiplex (M) | Reference            |
| KOPV Primers                  |                                                                           |                            |                              |                      |
| KOPV RNA 1 4669F              | AGA AAT CAA CAG CTC ATC CAG AG                                            | 500                        | U, M                         | Unpublished          |
| KOPV RNA 1 5168R              | ATC AAC AGA GCT CAG ATG ACC TG<br>ACT AAG AGT TTG TCA TAT TTG TAA TCT ACC | 441                        | U, M                         | Unpublished          |
| KOPV RNA 2 482F               | AGT TGA ACA AGA GCA CAT GAC CAC                                           | 504                        | U, M                         | Unpublished          |
| KOPV RNA 3 390F               | AAC TGG GTT CCT TTA CTG GTG AC                                            | 481                        | U, M                         | Unpublished          |
| KOPV RNA 3 863R               | CTG AGA GCA TGA AGT CAA CAG CA                                            | 500                        | U, M                         | Unpublished          |
| KOPV RNA 4 169F *             | GCA GAT TGC CTT ATT GCT TAT CAC C                                         |                            |                              |                      |
| KOPV RNA 4 649R *             | TCA AGA TTG TGA TAT GAG GAT GGC A                                         |                            |                              |                      |
| KOPV RNA 5 110F *             | ATG ATT CTG TTA GGT CTG GTT GCT                                           |                            |                              |                      |
| KOPV RNA 5 609R *             | AAT GAA AGC CTA CCC ATA CTT CCC                                           |                            |                              |                      |
| Vv-NAD5-F                     | GCT TCT TGG GGC TTC TTG TTC G                                             | 220                        | U                            | (Chooi et al., 2013) |
| Vv-NAD5-R                     | TCC CTC CCA TCC CAG GAA TAA TTG                                           |                            |                              |                      |

**Supplementary Table S3A and S3B.** Nucleotide and amino acid length comparison of emaraviruses to date.

**A.**

| RNA             | Virus      | Virus ID -<br>Accession | Genome         | 3' UTR         | ORF            | ORF            | 5' UTR         |
|-----------------|------------|-------------------------|----------------|----------------|----------------|----------------|----------------|
|                 |            |                         | Length<br>(nt) | Length<br>(nt) | Length<br>(nt) | Length<br>(aa) | Length<br>(nt) |
| RNA 1<br>(RdRp) | KOPV       | MZ391827                | 7141           | 63             | 6963           | 2320           | 115            |
|                 | AcCRaV     | KT861481                | 7061           | 38             | 6912           | 2303           | 111            |
|                 | AsMaV      | LR742461                | 7106           | 45             | 6912           | 2303           | 149            |
|                 | BLMaV      | KY056657                | 7050           | 42             | 6915           | 2304           | 93             |
|                 | ChMaV      | LC576445                | 7093           | 64             | 6909           | 2302           | 120            |
|                 | CORaV      | LR828198                | 7109           | 58             | 6954           | 2317           | 97             |
|                 | CRSaV-1    | MN385573                | 7109           | 68             | 6963           | 2320           | 78             |
|                 | CRSaV-2    | MN385577                | 7120           | 69             | 6975           | 2324           | 76             |
|                 | EMARaV     | NC_013105               | 7040           | 44             | 6882           | 2293           | 114            |
|                 | FMV        | NC_029562               | 7039           | 39             | 6894           | 2297           | 106            |
|                 | HPWMoV     | NC_029570               | 6981           | 68             | 6819           | 2272           | 94             |
|                 | JYMaV      | MK305894                | 7143           | 47             | 6984           | 2327           | 112            |
|                 | LiCRaV     | MT112174                | 7047           | 54             | 6897           | 2298           | 96             |
|                 | MaMaV      | MT879190                | 7074           | 48             | 6918           | 2305           | 108            |
|                 | Palo verde | MF766024                | 7015           | 60             | 6849           | 2282           | 106            |
|                 | PCLSaV     | LC554756                | 7099           | 68             | 6945           | 2314           | 86             |
|                 | PerMV      | LC496090                | 7291           | 79             | 7008           | 2335           | 204            |
|                 | PiVB       | MH727572                | 7027           | 52             | 6900           | 2299           | 75             |
|                 | PSPMV1     | HF568801                | 7022           | 49             | 6885           | 2294           | 88             |
|                 | PSPMV2     | NC_030660               | 7009           | 45             | 6885           | 2294           | 79             |
|                 | RLBV       | NC_029567               | 7062           | 48             | 6888           | 2295           | 126            |
|                 | RRV        | NC_015298               | 7026           | 62             | 6876           | 2291           | 88             |
|                 | RYRSaV     | JF795479                | 7049           | 40             | 6900           | 2299           | 109            |
|                 | TiRSaV     | MH223635                | 7217           | 56             | 7023           | 2340           | 138            |

|                |                           |            |      |     |      |      |     |
|----------------|---------------------------|------------|------|-----|------|------|-----|
|                | Vitis<br>emaravirus<br>T1 | LC604727   | 7053 | 54  | 6903 | 2300 | 96  |
| RNA 2          | KOPV                      | MZ391828   | 1943 | 58  | 1800 | 599  | 85  |
| (Glycoprotein) | AcCRaV                    | KT861482   | 2267 | 54  | 1962 | 653  | 251 |
|                | AsMaV                     | LR742462   | 2288 | 57  | 1926 | 641  | 305 |
|                | BLMaV                     | KY056658   | 2271 | 47  | 1959 | 652  | 265 |
|                | ChMaV                     | LC576446   | 2054 | 70  | 1902 | 633  | 82  |
|                | CORaV                     | LR828199   | 2310 | 71  | 1956 | 651  | 283 |
|                | CjaEV1                    | MN385574   | 2054 | 69  | 1956 | 651  | 29  |
|                | CjaEV2                    | MN385578   | 2089 | 78  | 1983 | 660  | 28  |
|                | EMARaV                    | NC_013106  | 2335 | 58  | 1941 | 646  | 336 |
|                | FMV                       | NC_029565  | 2252 | 52  | 1926 | 641  | 274 |
|                | HPWMoV                    | NC_029549  | 2211 | 79  | 2004 | 667  | 128 |
|                | JYMaV                     | MK305895   | 2233 | 21  | 2022 | 673  | 190 |
|                | LiCRaV                    | MT112175   | 2268 | 41  | 1953 | 650  | 274 |
|                | MaMaV                     | MT879191   | 2289 | 55  | 1941 | 646  | 293 |
|                | Palo verde                | MF766029   | 2098 | 40  | 1929 | 642  | 129 |
|                | PCLSaV                    | LC554757   | 2045 | 71  | 1839 | 612  | 135 |
|                | PerMV                     | LC496091   | 2092 | 54  | 1920 | 639  | 118 |
|                | PIVB                      | MH727573   | 2245 | 56  | 1923 | 640  | 266 |
|                | PPSMV1                    | HF568802.3 | 2223 | 41  | 1947 | 648  | 235 |
|                | PPSMV2                    | NC_030662  | 2229 | 47  | 1950 | 649  | 232 |
|                | RLBV                      | NC_029558  | 2135 | 49  | 1953 | 650  | 133 |
|                | RRV                       | NC_015299  | 2245 | 50  | 1938 | 645  | 257 |
|                | RYRSaV                    | JF795480   | 2220 | 50  | 1929 | 642  | 241 |
|                | TiRSaV                    | MH223636   | 2399 | 57  | 2154 | 717  | 188 |
|                | Vitis<br>emaravirus<br>T1 | LC604728   | 2091 | 56  | 1917 | 638  | 118 |
| RNA 3          | KOPV                      | MZ391829   | 1479 | 41  | 924  | 307  | 514 |
| (Nucelocapsid) | AcCRaV                    | KT861483   | 1678 | 100 | 933  | 310  | 645 |
|                | AsMaV                     | LR742463   | 1587 | 100 | 957  | 318  | 530 |
|                | BLMaV                     | KY056659   | 1510 | 97  | 951  | 316  | 462 |
|                | ChMaV                     | LC576447   | 1390 | 74  | 792  | 263  | 524 |

|                     |                           |           |      |     |      |     |     |
|---------------------|---------------------------|-----------|------|-----|------|-----|-----|
|                     | CORaV                     | LR828200  | 1338 | 74  | 876  | 291 | 388 |
|                     | CjaEV1                    | MN385575  | 1360 | 115 | 888  | 295 | 357 |
|                     | CjaEV2                    | MN385579  | 1316 | 116 | 900  | 299 | 300 |
|                     | EMARaV                    | NC_013108 | 1559 | 119 | 945  | 314 | 495 |
|                     | FMV                       | NC_029563 | 1491 | 99  | 948  | 315 | 444 |
|                     | HPWMoV                    | NC_029550 | 1441 | 219 | 870  | 289 | 352 |
|                     | JYMaV                     | MK305896  | 1259 | 70  | 885  | 294 | 304 |
|                     | LiCRaV                    | MT112176  | 1557 | 88  | 930  | 309 | 539 |
|                     | MaMaV                     | MT879192  | 1525 | 103 | 903  | 300 | 519 |
|                     | Palo verde                | MF766034  | 1356 | 85  | 879  | 292 | 392 |
|                     | PCLSaV                    | LC554758  | 1250 | 88  | 801  | 266 | 361 |
|                     | PerMV                     | LC496092  | 1080 | 92  | 798  | 265 | 190 |
|                     | PiVB                      | MH727547  | 1525 | 101 | 918  | 305 | 506 |
|                     | PPSMV1                    | HF568803  | 1442 | 102 | 927  | 308 | 413 |
|                     | PPSMV2                    | NC_030661 | 1335 | 295 | 939  | 312 | 101 |
|                     | RLBV                      | NC_029559 | 1365 | 53  | 879  | 292 | 433 |
|                     | RRV                       | NC_015300 | 1544 | 99  | 951  | 316 | 494 |
|                     | RYRSaV                    | JF795481  | 1414 | 89  | 942  | 313 | 383 |
|                     | TiRSaV                    | MH223637  | 1106 | 128 | 861  | 286 | 117 |
|                     | Vitis<br>emaravirus<br>T1 | LC604729  | 1211 | 108 | 939  | 312 | 164 |
| RNA 4<br>(Movement) | KOPV                      | MZ391830  | 1518 | 102 | 954  | 317 | 462 |
|                     | AcCRaV                    | KT861484  | 1664 | 98  | 1140 | 379 | 426 |
|                     | AsMaV                     | LR742464  | 1557 | 86  | 1086 | 361 | 385 |
|                     | BLMaV                     | KY056660  | 1504 | 29  | 1143 | 380 | 332 |
|                     | ChMaV                     | LC576449  | 1303 | 70  | 924  | 307 | 309 |
|                     | CORaV                     | LR828201  | 1411 | 67  | 1098 | 365 | 246 |
|                     | CjaEV1                    | MN385576  | 1349 | 154 | 1023 | 340 | 172 |
|                     | CjaEV2                    | MN385580  | 1154 | 89  | 1026 | 341 | 39  |
|                     | EMARaV                    | LR536379  | 1629 | 109 | 1122 | 373 | 398 |
|                     | FMV                       | NC_029564 | 1472 | 81  | 1086 | 361 | 305 |
|                     | HPWMoV                    | NC_029551 | 1682 | 112 | 1095 | 364 | 475 |
|                     | JYMaV                     | MK305897  | 1547 | 101 | 1125 | 374 | 321 |
|                     | LiCRaV                    | MT112177  | 1657 | 95  | 1146 | 381 | 416 |

|                           |           |      |     |      |     |     |
|---------------------------|-----------|------|-----|------|-----|-----|
| MaMaV                     | MT879193  | 1533 | 87  | 1092 | 363 | 354 |
| Palo verde                | MF766039  | 1481 | 70  | 1101 | 366 | 310 |
| PCLSaV                    | LC554759  | 1555 | 113 | 966  | 321 | 476 |
| PerMV                     | LC496094  | 1294 | 102 | 1032 | 343 | 160 |
| PiVB                      | MH727575  | 1550 | 81  | 1086 | 361 | 383 |
| PPSMV1                    | HF568804  | 1563 | 77  | 1086 | 361 | 400 |
| PPSMV2                    | NC_029560 | 1833 | 306 | 1422 | 473 | 105 |
| RLBV                      | NC_029560 | 1675 | 81  | 1122 | 373 | 472 |
| RRV                       | NC_015301 | 1541 | 83  | 1086 | 361 | 372 |
| RYRSaV                    | JF795482  | 1513 | 99  | 1131 | 376 | 283 |
| TiRSaV                    | MH223638  | 1342 | 81  | 999  | 332 | 262 |
| Vitis<br>emaravirus<br>T1 | LC604730  | 1628 | 80  | 1092 | 363 | 456 |

## B.

| RNA                                     | Virus  | Virus ID -<br>Accession | RNA # | Genome         | 5'<br>UTR      | ORF            | ORF            | 3' UTR         |
|-----------------------------------------|--------|-------------------------|-------|----------------|----------------|----------------|----------------|----------------|
|                                         |        |                         |       | Length<br>(nt) | Length<br>(nt) | Length<br>(nt) | Length<br>(aa) | Length<br>(nt) |
| RNA 5 -<br>8<br><br>Unknown<br>Function | KOPV   | MZ391831                | RNA 5 | 1576           | 86             | 810            | 269            | 680            |
|                                         | AcCRaV | KT861485                | RNA 5 | 1476           | 75             | 702            | 233            | 699            |
|                                         | AsMaV  | LR742465                | RNA 5 | 1324           | 69             | 744            | 247            | 511            |
|                                         | BLMaV  | KY056661                | RNA 5 | 1224           | 68             | 681            | 226            | 475            |
|                                         | ChMaV  | LC576450                | RNA 5 | 1154           | 56             | 525            | 174            | 573            |
|                                         |        | LC576451                | RNA 6 | 1707           | 84             | 1461           | 486            | 162            |
|                                         | CORaV  | LR828202                | RNA 5 | 1030           | 87             | 540            | 179            | 403            |
|                                         | CjaEV1 | MN557024                | RNA 5 | 1246           | 175            | 552            | 183            | 519            |
|                                         |        | MN557025                | RNA 6 | 1474           | 124            | 606            | 201            | 744            |

|            |            |       |      |     |      |     |     |
|------------|------------|-------|------|-----|------|-----|-----|
|            | MN557026   | RNA 7 | 1297 | 41  | 654  | 217 | 602 |
|            | MN557027   | RNA 8 | 1335 | 41  | 654  | 217 | 640 |
|            | >MN557028  | RNA 9 | 1155 | 113 | 858  | 285 | 184 |
| EMARaV     | NC_013107  | RNA 4 | 1348 | 145 | 699  | 232 | 504 |
|            | LR536380   | RNA 6 | 1362 | 147 | 690  | 229 | 525 |
| FMV        | NC_029566  | RNA 5 | 1752 | 57  | 1509 | 502 | 186 |
|            | NC_029568  | RNA 6 | 1212 | 68  | 567  | 188 | 577 |
| HPWMoV     | NC_029552  | RNA 5 | 1715 | 120 | 1437 | 478 | 158 |
|            | NC_029553  | RNA 6 | 1752 | 118 | 1479 | 492 | 155 |
|            | NC_029554  | RNA 7 | 1434 | 117 | 918  | 305 | 399 |
|            | NC_029555  | RNA 8 | 1339 | 93  | 531  | 176 | 715 |
| JYMaV      | MK305898   | RNA 5 | 1267 | 83  | 837  | 278 | 347 |
|            | MK305899   | RNA 6 | 980  | 89  | 585  | 194 | 306 |
| LiCRaV     | MT112178   | RNA 5 | 1269 | 92  | 684  | 227 | 493 |
| MaMaV      | MT879194   | RNA 5 | 1825 | 92  | 1434 | 477 | 299 |
|            | MT879195   | RNA 6 | 1179 | 70  | 696  | 231 | 413 |
| Palo verde | -          | -     | -    | -   | -    | -   | -   |
| PCLSaV     | LC554760   | RNA 5 | 1253 | 86  | 849  | 282 | 318 |
| PerMV      | LC496095   | RNA 5 | 1066 | 72  | 831  | 276 | 163 |
|            | LC496096   | RNA 6 | 1128 | 33  | 762  | 253 | 333 |
|            | LC496099   | RNA 7 | 998  | 73  | 726  | 241 | 199 |
| PiVB       | MH727576   | RNA 5 | 1716 | 87  | 1449 | 482 | 180 |
|            | MH727578   | RNA 6 | 1340 | 68  | 723  | 240 | 549 |
|            | MH727579   | RNA 7 | 1709 | 14  | 1515 | 504 | 180 |
| PPSMV1     | HF945448.2 | RNA 5 | 1801 | 84  | 1422 | 473 | 295 |
|            | KX363891   | RNA 6 | 1194 | 29  | 756  | 251 | 409 |
| PPSMV2     | NC_030658  | RNA 5 | 1833 | 105 | 1422 | 473 | 306 |



|                        |  |           |       |      |    |      |     |     |
|------------------------|--|-----------|-------|------|----|------|-----|-----|
|                        |  | NC_030659 | RNA 6 | 1194 | 29 | 756  | 251 | 409 |
| RLBV                   |  | NC_029561 | RNA 5 | 1718 | 67 | 1431 | 476 | 220 |
|                        |  | NC_029571 | RNA 6 | 1095 | 93 | 567  | 188 | 435 |
|                        |  | NC_029572 | RNA 7 | 1089 | 77 | 579  | 192 | 433 |
|                        |  | NC_029573 | RNA 8 | 1273 | 86 | 702  | 233 | 485 |
| RRV                    |  | NC_034979 | RNA 5 | 1665 | 61 | 1404 | 467 | 200 |
|                        |  | NC_034980 | RNA 6 | 1402 | 68 | 702  | 233 | 632 |
|                        |  | NC_034981 | RNA 7 | 1649 | 61 | 1398 | 465 | 190 |
| RYRSaV                 |  | KU904300  | RNA 5 | 1272 | 86 | 672  | 223 | 514 |
| TiRSaV                 |  | MH223639  | RNA 5 | 1323 | 69 | 516  | 171 | 738 |
| Vitis emaravirus<br>T1 |  | LC604731  | RNA 5 | 1324 | 91 | 768  | 255 | 465 |

---

**Supplementary Table S4.** Genome coverage of Illumina sequencing

Karaka Ōkahu purepure virus (KÖPV)

| Karaka Ōkahu<br>purepure virus RNA | Length<br>(nt) | Reads mapped from<br>MiSeq (300 nt) | Coverage<br>MiSeq | Reads mapped from<br>HiSeq (21 nt sRNA) | Coverage<br>HiSeq |
|------------------------------------|----------------|-------------------------------------|-------------------|-----------------------------------------|-------------------|
| 1                                  | 7141           | 1234                                | 52                | 508311                                  | 1495              |
| 2                                  | 1943           | 387                                 | 60                | 96979                                   | 1048              |
| 3                                  | 1479           | 2516                                | 510               | 809420                                  | 11493             |
| 4                                  | 1518           | 1118                                | 221               | 740503                                  | 10244             |
| 5                                  | 1576           | 1292                                | 246               | 301915                                  | 4023              |
